**Asako Furuhashi-Yonaha, M.D.**  
 Instructor  
**Shuji Dohi, M.D.**  
 Professor and Chair  
 shu-dohi@cc.gifu-u.ac.jp  
**Tsutomu Oshima, M.D.**  
 Assistant Professor  
 Department of Anesthesiology and Critical  
 Care Medicine  
 Gifu University School of Medicine  
 Gifu City  
 Gifu, Japan  
**Norio Ueda, M.D.**  
 Vice Director  
 Department of Anesthesia  
 Gifu City Hospital  
 Gifu City  
 Gifu, Japan

## References

1. Willms D, Shure D: Pulmonary edema due to upper airway obstruction in adults. *Chest* 1988; 94:1090-2
2. Dohi S, Okubo N, Kondo Y: Pulmonary edema after airway obstruction due to bilateral vocal cord paralysis. *Can J Anaesth* 1991; 38:492-5
3. Brandom BW: Pulmonary edema after airway obstruction. *Int Anesthesiol Clin* 1997; 35:75-84
4. Deepika K, Kanaan CA, Barrocas AM, Fonseca JJ, Bikazi GB:

Negative pressure pulmonary edema after acute upper airway obstruction. *J Clin Anesth* 1997; 9:403-8

5. Nishino T, Kochi T: Effect of sedation produced by thiopentone on responses to nasal occlusion in female adults. *Br J Anaesth* 1993; 71:388-92
6. Oshima T, Masaki Y, Toyooka H: Flumazenil antagonized midazolam-induced airway narrowing during nasal breathing in humans. *Br J Anaesth* 1999; 82:698-702
7. Meissner HH, Robinson L, Dubinett SM, Santiago SM: Pulmonary edema as a result of chronic upper airway obstruction. *Respir Med* 1998; 92:1174-6
8. Tagaito Y, Isono S, Nishino T: Upper airway reflexes during a combination of propofol and fentanyl anesthesia. *ANESTHESIOLOGY* 1998; 88:1459-66
9. Nishino T, Sugiyama A, Tanaka A, Ishikawa T: Effects of topical nasal anesthesia on shift of breathing route in adults. *Lancet* 1992; 339:1497-500
10. Mathru M, Esch O, Lang J, Herbert ME, Chaljub G, Goodacre B, van Sonnenberg E: Magnetic resonance imaging of the upper airway: Effect of propofol anesthesia and nasal continuous positive airway pressure in humans. *ANESTHESIOLOGY* 1996; 84:273-9
11. Goodman NW, Vanner RG, Wade JA: Effects of incremental doses of alfentanil and propofol on the breathing of anesthetized patients. *Br J Anaesth* 1989; 63:548-53
12. Mortimore IL, Mathur R, Douglas NJ: Effect of posture, route of respiration, and negative pressure on palatal muscle activity in humans. *J Appl Physiol* 1995; 79:448-54

(Accepted for publication November 4, 1999.)

Anesthesiology  
 2000; 92:1210-1  
 © 2000 American Society of Anesthesiologists, Inc.  
 Lippincott Williams & Wilkins, Inc.

## An Efficient Technique for Tracheal Intubation Using the StyletScope Alone

*To the Editor:*—The StyletScope (NihonKoden Corp., Tokyo, Japan) is a new device for tracheal intubation. It is a light-weight stylet with a fiber-optic view, maneuverability of its distal tip, and a built-in light source. Previously, we reported that the StyletScope, in combination with a standard laryngoscope, allows successful intubation in patients with simulated difficult airway.<sup>1</sup> A similar fiber-optic device was reported to function well without a laryngoscope<sup>2</sup>; however, it remains unclear whether the StyletScope can be used for tracheal intubation without the aid of a standard laryngoscope. We prospectively assessed a new procedure for tracheal intubation using the StyletScope alone.

After obtaining approval from the Ethics Committee for Research of our institution and the informed consent of each patient, 11 patients undergoing general surgery participated in this study. Mean age, height, and weight values were 56 yr (range, 25-72 yr), 160 cm (range, 143-176 cm), and 56 kg (range, 38-77 kg), respectively. Using the Mallampati test modified by Samssoon and Young,<sup>3</sup> seven patients were

classified as class I, three patients were classified as class II, and one patient was classified as class III.

Patients were premedicated with 0.01 mg/kg atropine and 0.5 mg/kg hydroxyzine. After preoxygenation, general anesthesia was induced with 2.0  $\mu\text{g}/\text{kg}$  fentanyl and 1.0 mg/kg propofol, with subsequent infusion at a rate of 10 mg  $\cdot$  kg<sup>-1</sup>  $\cdot$  h<sup>-1</sup> propofol and 0.15 mg/kg vecuronium. With the patient's head and neck in the sniffing position and the lower jaw held upward by an assistant, an endotracheal tube (ETT) with the StyletScope was inserted into the mouth. At this point, the back of epiglottis could be viewed through the eyepiece of the StyletScope (fig. 1). By advancing the tip into the space between the epiglottis and the posterior wall of the pharynx and depressing the lever of the StyletScope gently to bend the tip of the ETT anteriorly, we could obtain the view of laryngeal structure and insert the ETT into the glottic opening during visual control. During the intubation procedure, all views of pharyngolaryngeal structures were obtained through the StyletScope.

## CORRESPONDENCE

**Fig. 1.** Views of the laryngeal structure through the StyletScope during the intubation procedure. These photographs were taken by a charge-coupled device camera attached to the eyepiece of the StyletScope. The image guide of the StyletScope is 3,500 pixels; views of the back of epiglottis (*upper left*), the glottis (*upper right*), the vocal cords (*lower left*), and the trachea (*lower right*) are clear enough for tracheal intubation.

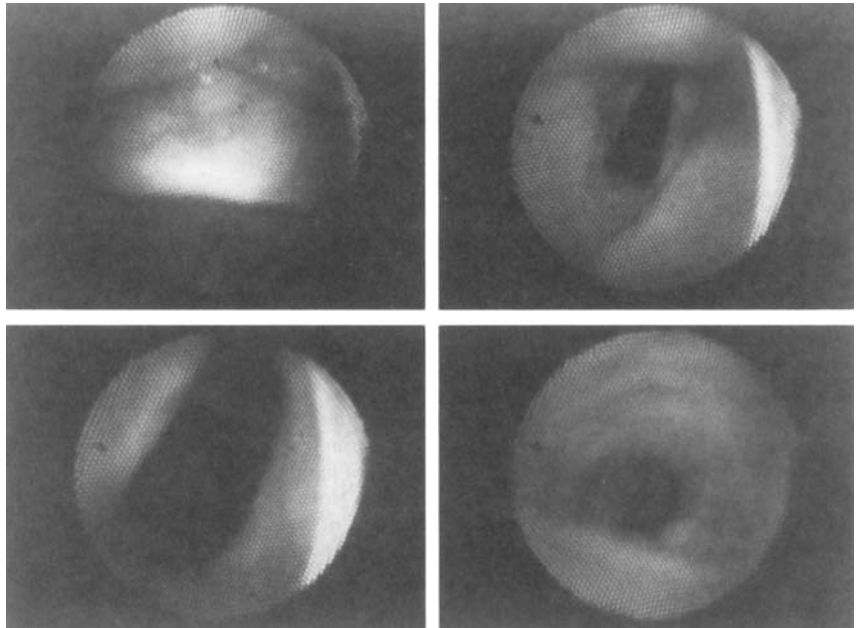

The success rate of tracheal intubation at the first attempt was 10 of 11 cases; the failed instance, caused by mucus secretions on the lens was successfully intubated at the second attempt. The mean time necessary for tracheal intubation (*i.e.*, from the moment of ETT insertion with the StyletScope to the time the StyletScope was removed from the ETT) was  $22 \pm 11$  s (mean  $\pm$  SD) in all cases. Changes in hemodynamics were within acceptable ranges, and oxygen saturation by pulse oximetry ( $Sp_{O_2}$ ) was maintained above 99% during the intubation procedure in all patients. No adverse effects were observed; however, one case of a slight sore throat and one case of slight hoarseness were observed on the first postoperative day.

The advantage of this intubation procedure is to eliminate the risk of dental trauma and soft tissue damage caused by the manipulation of the standard laryngoscope. Moreover, the StyletScope may be a useful alternative to tracheal intubation in patients with a restriction of the mouth opening, if an ETT can be inserted into the mouth. Our additional experience of intubation using the StyletScope alone suggests that it is possible to perform this procedure safely with the patient's head and neck in a neutral position, and without an assistant in elevating the patient's jaw.

In conclusion, tracheal intubation using the StyletScope alone is an efficient technique in patients with normal airway anatomy. Although we have not tested this technique for patients with a difficult airway, we speculate that the StyletScope may circumvent difficult airway problems.

**Takayuki Kitamura, M.D.**  
Clinical and Research Fellow  
**Yoshitsugu Yamada, M.D., Ph.D.**  
Associate Professor  
Surgical Center

The Institute of Medical Science  
ysyamada-ky@umin.u-tokyo.ac.jp  
**Hong-Lin Du, M.D., Ph.D.**  
Visiting Assistant Professor  
**Kazuo Hanaoka, M.D., Ph.D.**  
Professor and Chair  
Department of Anesthesiology  
Faculty of Medicine  
The Institute of Medical Science  
University of Tokyo  
Minato-ku  
Tokyo, Japan

## References

1. Kitamura T, Yamada Y, Du H-L, Hanaoka K: Efficiency of a new fiberoptic stylet scope in the tracheal intubation. *ANESTHESIOLOGY* 1999; 92:1628-32
2. Gravenstein D, Melker RJ, Lamptang S: Clinical assessment of a plastic optical fiber stylet for human tracheal intubation. *ANESTHESIOLOGY* 1999; 91:648-53.
3. Samssoon GLT, Young JRB: Difficult tracheal intubation: A retrospective study. *Anaesthesia* 1987; 42:487-90

(Accepted for publication November 29, 1999.)
